# Supplementary material for: Integrated multi-omics analyses reveal effects of empagliflozin on intestinal homeostasis in high-fat-diet mice
Source: PubMed Central journal article supplement — iScience. 2022 Dec 17;26(1):105816. doi: 10.1016/j.isci.2022.105816 (PMC9830204; doi:10.1016/j.isci.2022.105816), 2022-12-17
Supplement: mmc1.pdf [file mmc1.pdf]

## **Supplemental information**

### **Integrated multi-omics analyses reveal effects of empagliflozin on intestinal homeostasis in high-fat-diet mice**

**Junfeng Shi, Hongyan Qiu, Qian Xu, Yuting Ma, Tongtong Ye, Zengguang Kuang, Na Qu, Chengxia Kan, Ningning Hou, Fang Han, and Xiaodong Sun**

## Supplementary figures

**Figure S1. The linear discriminant analysis showed taxonomic biomarkers, related to Figure 3.**

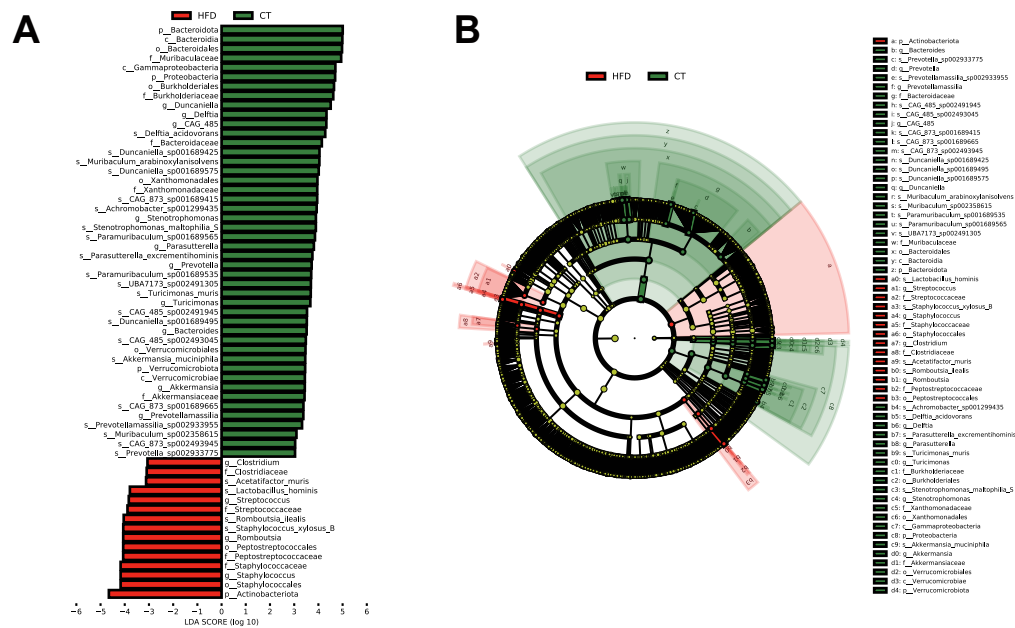

A) Cladogram indicating the phylogenetic distribution of microbiota correlating with the CT or HFD groups. B) Histogram of the linear discriminant analysis scores showing differences in abundance between the CT and HFD groups.



**Figure S3. KEGG enrichment analysis of the gut metabolites observed in HFD/CT, related to Figure 5.**

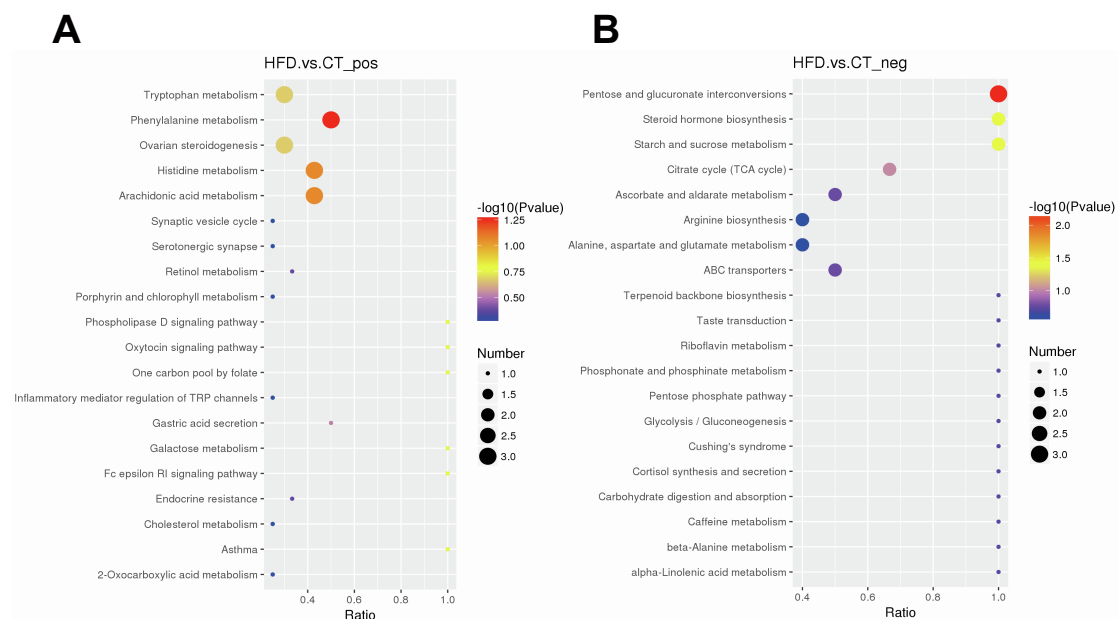

The scatter plot shows the altered pathways of metabolites in positive ion mode A) and negative ion mode B).

**Figure S4. Enrichment analysis of HFD/CT DEGs, related to Figure 6.**

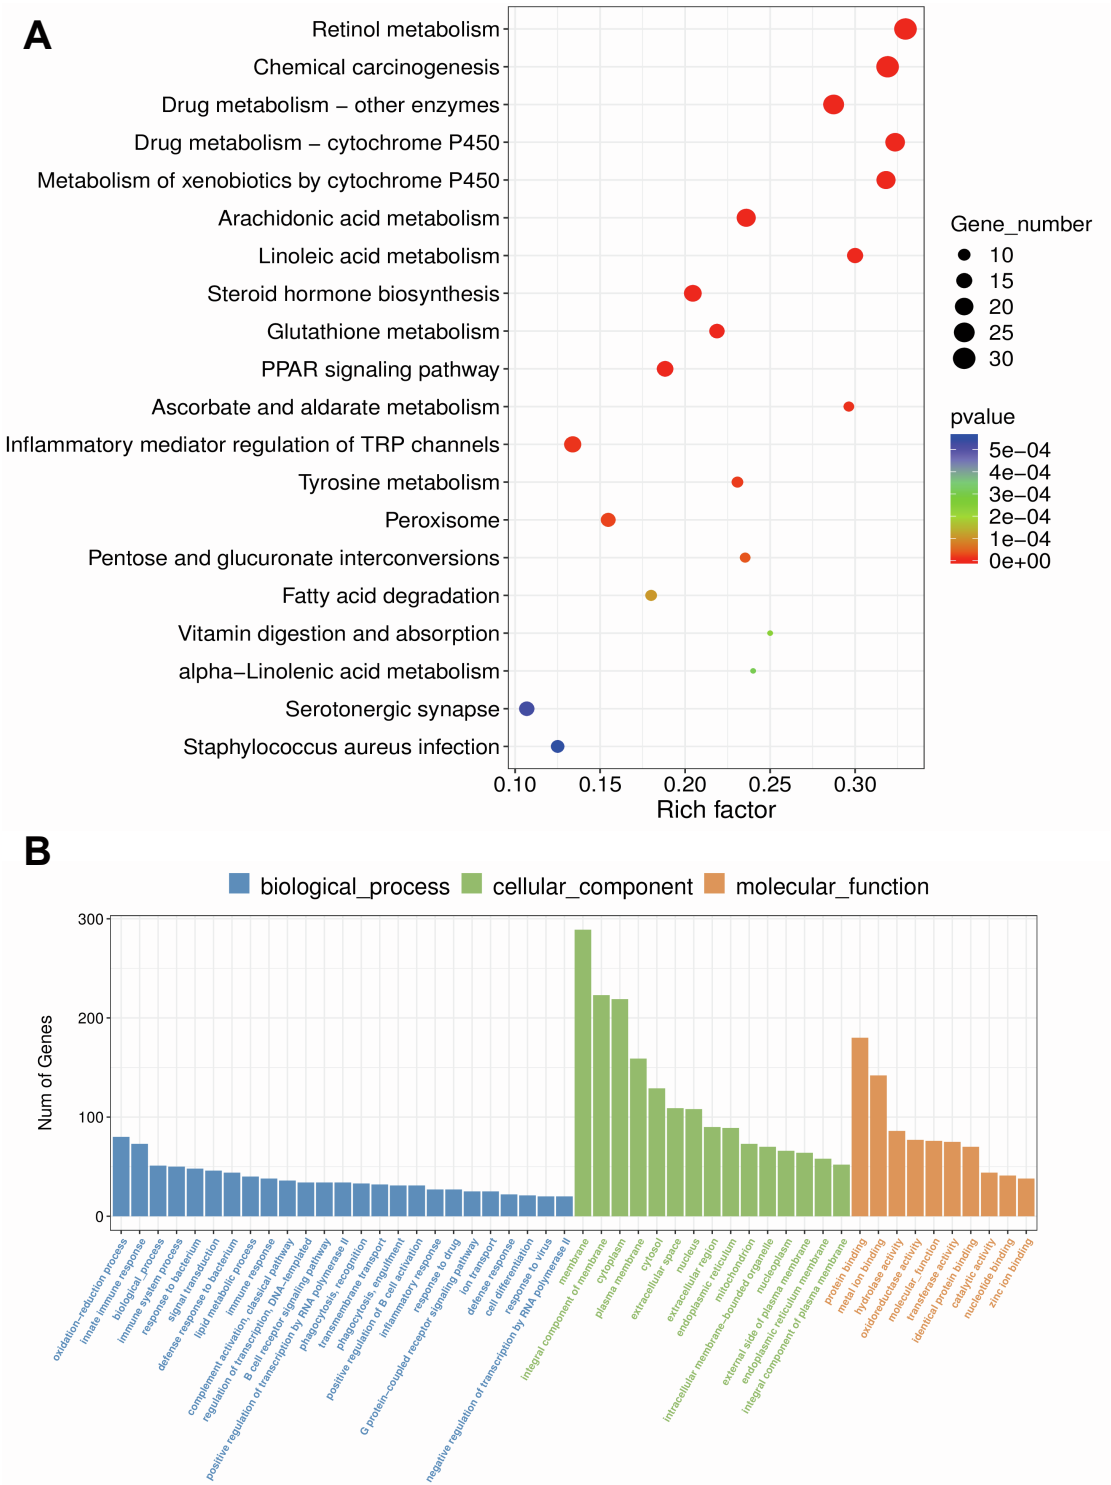

KEGG A) and GO B) enrichment.
